# Supplementary material
Source: MDPI journal article supplement (https://www.mdpi.com/2073-4395/12/5/983)
Supplement: s1 [file s1]

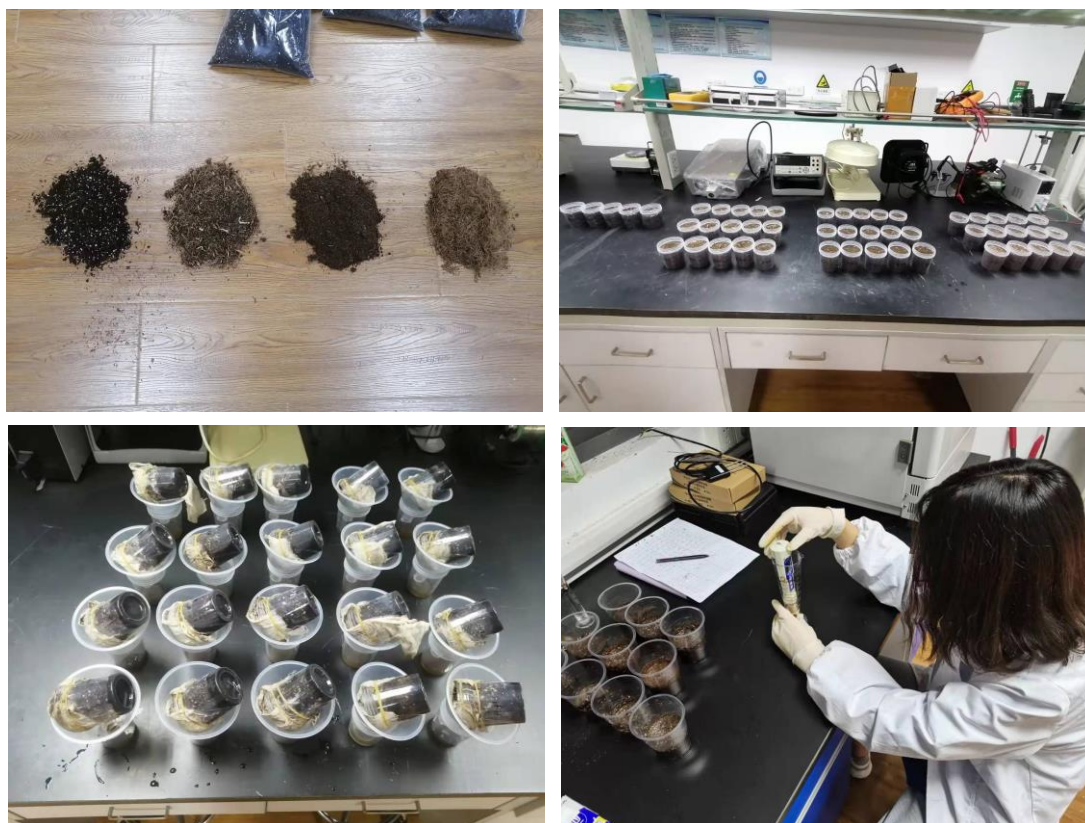

**Figure S1.** Compound substrate treatments and testing for their physicochemical properties.

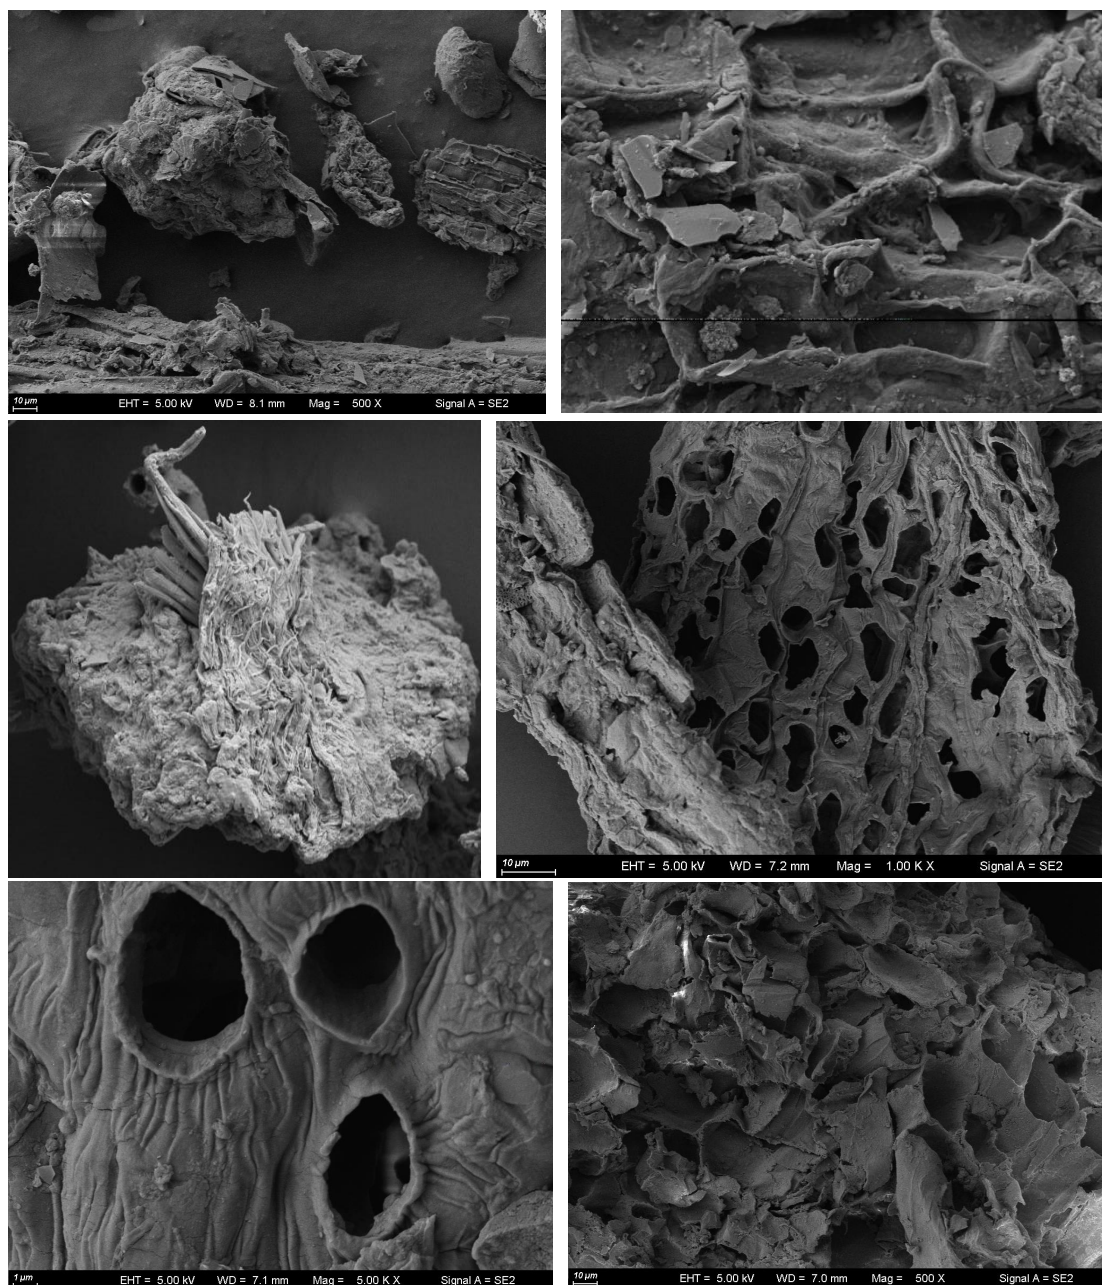

**Figure S2.** SEM images of the major materials of compound substrates.

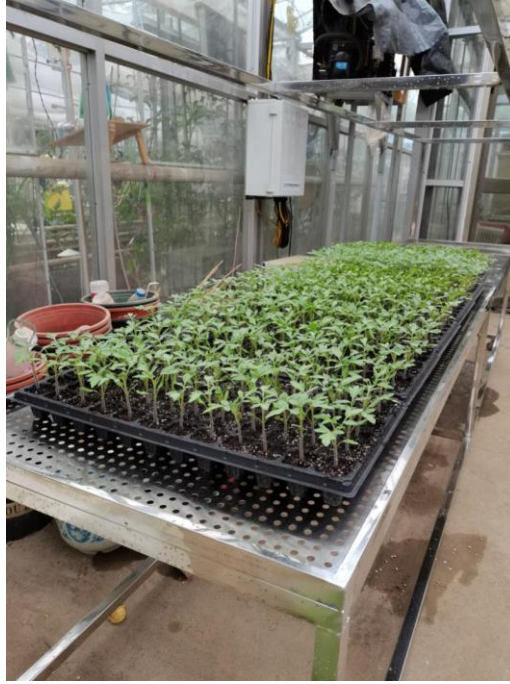

**Figure S3.** Tomato seedling raised in different compound substrates.

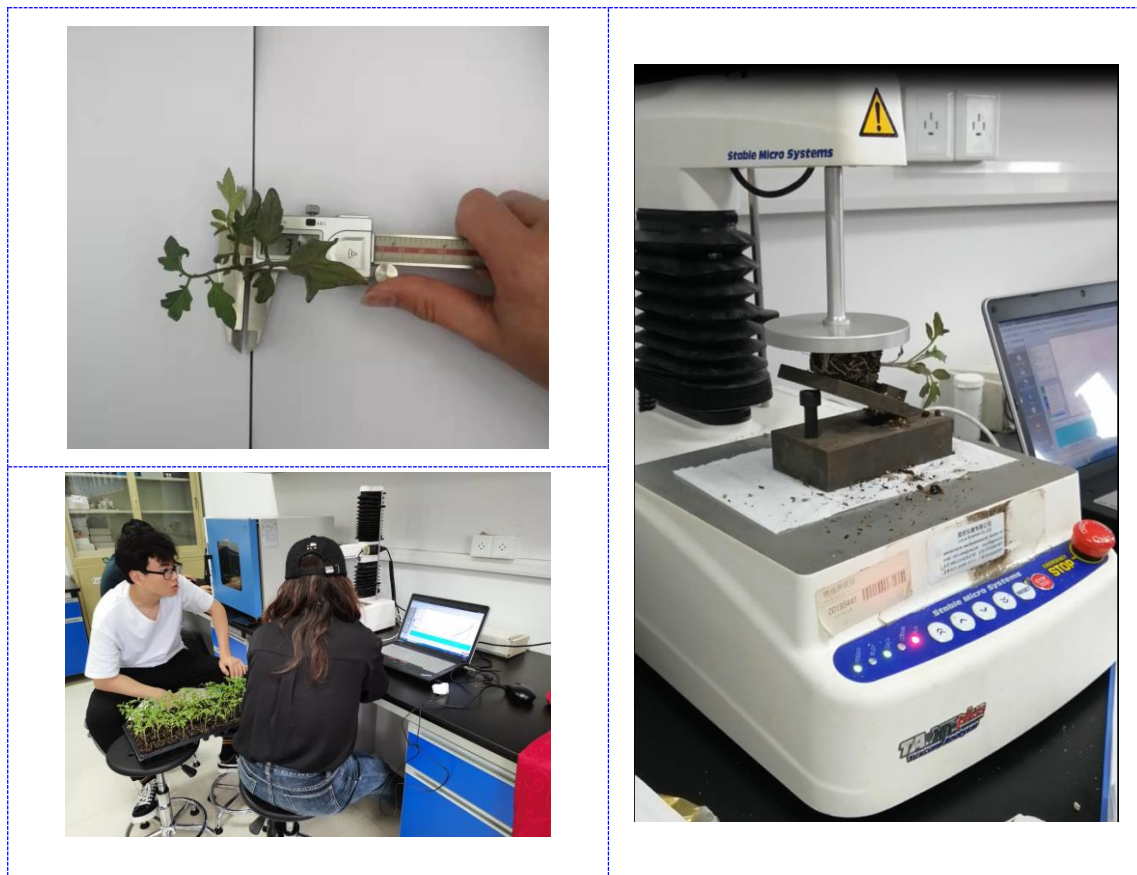

**Figure S4.** Testing for the growth and mechanical properties of plug seedlings.

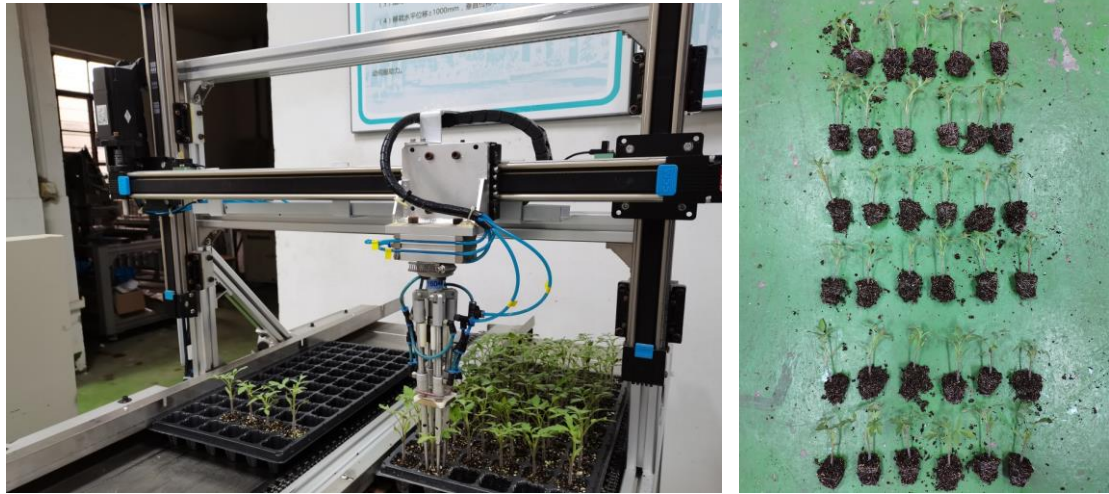

**Figure S5.** Automatic transplanting works from the growing trays to the destination trays.
